# Supplementary material for: Multi-responsive chemosensing and photocatalytic properties of three luminescent coordination polymers derived from a bifunctional 1,1′-di(4-carbonylphenyl)-2,2′-biimidazoline ligand
Source: Royal Society of Chemistry journal article supplement (doi:10.1039/d0ce00814a), 2020-01-01
Supplement: d0ce00814a1.pdf [file d0ce00814a1.pdf]

Electronic Supplementary Information (ESI) for

## Multiresponsive chemosensing and photocatalytic properties of three luminescent coordination polymers derived from bifunctional 1,1'-Di(4-carbonylphenyl)-2,2'-biimidazole ligand

Jun Wang,<sup>\*a</sup> Ning-Ning Chen,<sup>a</sup> Jin Qian,<sup>a</sup> Xuan-Rong Chen,<sup>a</sup> Xin-Yue Zhang,<sup>a</sup> and Liming Fan<sup>\*b</sup>

<sup>a</sup>School of Chemistry & Environmental Engineering, Yancheng Teachers University, Yancheng, 224007, China.

<sup>b</sup>Department of Chemistry, College of Science, North University of China, Taiyuan 030051, China.

E-mail: wjyctu@hotmail.com; limingfan@nuc.edu.cn.

### Table of Contents

|                                                                                                                                                                                                                              |    |
|------------------------------------------------------------------------------------------------------------------------------------------------------------------------------------------------------------------------------|----|
| <b>Table S1</b> Crystal data and structure refinement parameters of <b>1–3</b> .....                                                                                                                                         | 3  |
| <b>Table S2</b> Selected bond lengths (Å) and angles (°) for <b>1–3</b> .....                                                                                                                                                | 4  |
| <b>Table S3</b> Standard deviation and detection limit calculation for Fe <sup>3+</sup> , Cr <sub>2</sub> O <sub>7</sub> <sup>2-</sup> and NZF in <b>1</b> .....                                                             | 4  |
| <b>Table S4</b> Standard deviation and detection limit calculation for Fe <sup>3+</sup> , Cr <sub>2</sub> O <sub>7</sub> <sup>2-</sup> and NZF in <b>2</b> .....                                                             | 4  |
| <b>Table S5</b> Standard deviation and detection limit calculation for Fe <sup>3+</sup> , Cr <sub>2</sub> O <sub>7</sub> <sup>2-</sup> and NZF in <b>3</b> .....                                                             | 5  |
| <b>Table S6</b> Comparison of various CPs sensors for the detection of Fe <sup>3+</sup> , Cr <sub>2</sub> O <sub>7</sub> <sup>2-</sup> and NZF.....                                                                          | 6  |
| <b>Scheme S1</b> The structure of 1,1'-di(4-carbonylphenyl)-2,2'-biimidazole (H <sub>2</sub> L).....                                                                                                                         | 8  |
| <b>Scheme S2</b> The structures of selected antibiotics.....                                                                                                                                                                 | 8  |
| <b>Fig. S1</b> FT-IR spectra of <b>1-3</b> and <b>1-3</b> recovered from Fe <sup>3+</sup> , Cr <sub>2</sub> O <sub>7</sub> <sup>2-</sup> and NZF.....                                                                        | 9  |
| <b>Fig. S2</b> The binuclear [Cd <sub>2</sub> (BIM) <sub>2</sub> ] SBU in <b>1</b> .....                                                                                                                                     | 9  |
| <b>Fig. S3</b> The 3D porous network with the 1D circular channels of <b>1</b> .....                                                                                                                                         | 9  |
| <b>Fig. S4</b> The binuclear [Cd <sub>2</sub> (COO) <sub>2</sub> (DMF)] cluster in <b>2</b> .....                                                                                                                            | 10 |
| <b>Fig. S5</b> The 1D [Cd <sub>2</sub> (COO) <sub>2</sub> (DMF)] <sub>n</sub> chain with 6-fold helix in <b>2</b> .....                                                                                                      | 10 |
| <b>Fig. S6</b> The binuclear [Cd <sub>2</sub> (BIM) <sub>2</sub> ] SBU in <b>2</b> .....                                                                                                                                     | 10 |
| <b>Fig. S7</b> The 3D porous network of <b>2</b> .....                                                                                                                                                                       | 11 |
| <b>Fig. S8</b> The 3D 4-nodal (3,4,5,8)-c {4.5 <sup>2</sup> } {4 <sup>3</sup> .5 <sup>3</sup> } {4 <sup>3</sup> .5 <sup>7</sup> } {4 <sup>5</sup> .5 <sup>11</sup> .6 <sup>7</sup> .7 <sup>4</sup> .8} net of <b>2</b> ..... | 11 |
| <b>Fig. S9</b> The 3D porous framework containing the 1D circle channels of <b>3</b> .....                                                                                                                                   | 12 |
| <b>Fig. S10</b> PXRD patterns of <b>1-3</b> .....                                                                                                                                                                            | 12 |
| <b>Fig. S11</b> TGA curves for <b>1–3</b> .....                                                                                                                                                                              | 12 |
| <b>Fig. S12</b> The solid state diffuse-reflectance spectra for <b>1</b> , <b>2</b> , <b>3</b> and H <sub>2</sub> L ligand.....                                                                                              | 13 |
| <b>Fig. S13</b> Fluorescence response of <b>1(a)</b> , <b>2(b)</b> and <b>3(c)</b> toward different metal cations in H <sub>2</sub> O solution.....                                                                          | 13 |
| <b>Fig. S14</b> The stern–Volmer plots of Fe <sup>3+</sup> in <b>1(a)</b> , <b>2(b)</b> and <b>3(c)</b> .....                                                                                                                | 13 |
| <b>Fig. S15</b> Luminescence intensity of <b>1(a)</b> , <b>2(b)</b> and <b>3(c)</b> with different mixed cations solution added Fe <sup>3+</sup> ions (10 <sup>-2</sup> M)                                                   |    |

|                                                                                                                                                                                                                                                                                                                                                                                                                                                                                                                                                  |    |
|--------------------------------------------------------------------------------------------------------------------------------------------------------------------------------------------------------------------------------------------------------------------------------------------------------------------------------------------------------------------------------------------------------------------------------------------------------------------------------------------------------------------------------------------------|----|
| (m1: Ag <sup>+</sup> /Na <sup>+</sup> /Co <sup>2+</sup> ; m2: Li <sup>+</sup> /Ni <sup>2+</sup> /Zn <sup>2+</sup> ; m3: Mg <sup>2+</sup> /Pb <sup>2+</sup> /Cd <sup>2+</sup> ; m4: Cr <sup>3+</sup> /Ca <sup>2+</sup> ; m5: Al <sup>3+</sup> /Cu <sup>2+</sup> ; ; m6: Ni <sup>2+</sup> ; m7: Cr <sup>3+</sup> ).....                                                                                                                                                                                                                            | 14 |
| <b>Fig. S16</b> Fluorescence response of <b>1(a)</b> , <b>2(b)</b> and <b>3(c)</b> toward different anions in H <sub>2</sub> O solution .....                                                                                                                                                                                                                                                                                                                                                                                                    | 14 |
| <b>Fig. S17</b> The stern–Volmer plots of Cr <sub>2</sub> O <sub>7</sub> <sup>2-</sup> in <b>1(a)</b> , <b>2(b)</b> and <b>3(c)</b> .....                                                                                                                                                                                                                                                                                                                                                                                                        | 14 |
| <b>Fig. S18</b> Luminescence intensity of <b>1(a)</b> , <b>2(b)</b> and <b>3(c)</b> with different mixed cations solution added Cr <sub>2</sub> O <sub>7</sub> <sup>2-</sup> ions (10 <sup>-2</sup> M) (m1: C <sub>2</sub> O <sub>4</sub> <sup>2-</sup> /H <sub>2</sub> PO <sub>4</sub> <sup>-</sup> ; m2: PO <sub>4</sub> <sup>3-</sup> /SCN <sup>-</sup> ; m3: NO <sub>3</sub> <sup>-</sup> / HCO <sub>3</sub> <sup>-</sup> ; m4: Br/HPO <sub>4</sub> <sup>2-</sup> ; m5: SO <sub>4</sub> <sup>2-</sup> / CO <sub>3</sub> <sup>2-</sup> )..... | 15 |
| <b>Fig. S19</b> Fluorescence response of <b>1(a)</b> , <b>2(b)</b> and <b>3(c)</b> toward different antibiotics in H <sub>2</sub> O solution .....                                                                                                                                                                                                                                                                                                                                                                                               | 15 |
| <b>Fig. S20</b> The stern–Volmer plots of NZF in <b>1(a)</b> , <b>2(b)</b> and <b>3(c)</b> .....                                                                                                                                                                                                                                                                                                                                                                                                                                                 | 15 |
| <b>Fig. S21</b> Luminescence intensity of <b>1(a)</b> , <b>2(b)</b> and <b>3(c)</b> with different mixed cations solution added NZF (10 <sup>-2</sup> M) (m1: PCL; m2: SDZ; m3: MDZ; m4: CAP) .....                                                                                                                                                                                                                                                                                                                                              | 16 |
| <b>Fig. S22</b> UV-vis spectra of different cations in H <sub>2</sub> O solutions, and the emission spectra of <b>1(a)</b> , <b>2(b)</b> and <b>3(c)</b> .....                                                                                                                                                                                                                                                                                                                                                                                   | 16 |
| <b>Fig. S23</b> UV-vis spectra of different anions in H <sub>2</sub> O solutions, and the emission spectra of <b>1(a)</b> , <b>2(b)</b> and <b>3(c)</b> .....                                                                                                                                                                                                                                                                                                                                                                                    | 16 |
| <b>Fig. S24</b> UV-vis spectra of different antibiotics in H <sub>2</sub> O solutions, and the emission spectra of <b>1(a)</b> , <b>2(b)</b> and <b>3(c)</b> .....                                                                                                                                                                                                                                                                                                                                                                               | 17 |
| <b>Fig. S25</b> Kubelka–Munk-transformed diffuse reflectance spectra of <b>1(a)</b> , <b>2(b)</b> and <b>3(c)</b> .....                                                                                                                                                                                                                                                                                                                                                                                                                          | 17 |

**Table S1** Crystal data and structure refinement parameters of **1–3**

| CP                                                                | <b>1</b>                                                         | <b>2</b>                                                                                        | <b>3</b>                                                         |
|-------------------------------------------------------------------|------------------------------------------------------------------|-------------------------------------------------------------------------------------------------|------------------------------------------------------------------|
| Formula                                                           | C <sub>20</sub> H <sub>24</sub> CdN <sub>4</sub> O <sub>10</sub> | C <sub>63</sub> H <sub>45</sub> Cd <sub>4</sub> Cl <sub>2</sub> N <sub>13</sub> O <sub>14</sub> | C <sub>20</sub> H <sub>14</sub> N <sub>4</sub> O <sub>5</sub> Zn |
| Formula weight                                                    | 592.84                                                           | 1728.66                                                                                         | 455.75                                                           |
| Crystal system                                                    | Monoclinic                                                       | Hexagonal                                                                                       | Trigonal                                                         |
| Space group                                                       | <i>P</i> 2 <sub>1</sub> / <i>c</i>                               | <i>P</i> 6 <sub>1</sub>                                                                         | <i>R</i> -3                                                      |
| <i>a</i> (Å)                                                      | 12.4871(10)                                                      | 16.2489(13)                                                                                     | 32.2321(19)                                                      |
| <i>b</i> (Å)                                                      | 14.3971(12)                                                      | 16.2489(13)                                                                                     | 32.2321(19)                                                      |
| <i>c</i> (Å)                                                      | 16.4209(10)                                                      | 45.5303(17)                                                                                     | 14.2264(11)                                                      |
| $\alpha$ (°)                                                      | 90                                                               | 90                                                                                              | 90                                                               |
| $\beta$ (°)                                                       | 114.354(5)                                                       | 90                                                                                              | 90                                                               |
| $\gamma$ (°)                                                      | 90                                                               | 120                                                                                             | 120                                                              |
| <i>V</i> (Å <sup>3</sup> )                                        | 2689.4(4)                                                        | 10411(2)                                                                                        | 12800(2)                                                         |
| <i>Z</i>                                                          | 4                                                                | 6                                                                                               | 18                                                               |
| <i>D</i> <sub>calcd</sub> (Mg/m <sup>3</sup> )                    | 1.464                                                            | 1.637                                                                                           | 1.022                                                            |
| $\mu$ (mm <sup>-1</sup> )                                         | 0.867                                                            | 1.355                                                                                           | 0.887                                                            |
| Temperature (K)                                                   | 296(2)                                                           | 291(2)                                                                                          | 291(2)                                                           |
| <i>F</i> (000)                                                    | 1200                                                             | 5052                                                                                            | 3996                                                             |
| <i>R</i> <sub>int</sub>                                           | 0.0208                                                           | 0.0062                                                                                          | 0.0252                                                           |
| <i>R</i> <sub>1</sub> [ <i>I</i> > 2σ( <i>I</i> )] <sup>a</sup>   | 0.0421                                                           | 0.0317                                                                                          | 0.0383                                                           |
| w <i>R</i> <sub>2</sub> [ <i>I</i> > 2σ( <i>I</i> )] <sup>b</sup> | 0.1283                                                           | 0.1034                                                                                          | 0.0923                                                           |
| Gof                                                               | 1.075                                                            | 1.032                                                                                           | 1.091                                                            |

$$R_1 = \frac{\sum ||F_o| - |F_c||}{\sum |F_o|}, \quad \omega R_2 = \frac{\sum [w(F_o^2 - F_c^2)^2]}{\sum [w(F_o^2)^2]}^{1/2}$$

**Table S2** Selected bond lengths (Å) and angles (°) for 1–3

| CP 1                                                                                                                                              |            |                                               |            |                                              |            |                                                |            |
|---------------------------------------------------------------------------------------------------------------------------------------------------|------------|-----------------------------------------------|------------|----------------------------------------------|------------|------------------------------------------------|------------|
| Cd(1)-O(1)                                                                                                                                        | 2.450(3)   | Cd(1)-O(2)                                    | 2.323(3)   | Cd(1)-O(5)                                   | 2.410(4)   | Cd(1)-O(4)#1                                   | 2.237(3)   |
| Cd(1)-N(4)#2                                                                                                                                      | 2.292(3)   | Cd(1)-N(2)#3                                  | 2.352(3)   |                                              |            |                                                |            |
| O(2)-Cd(1)-O(1)                                                                                                                                   | 54.49(11)  | O(5)-Cd(1)-O(1)                               | 109.88(16) | O(2)-Cd(1)-O(5)                              | 86.46(14)  | N(2)#3-Cd(1)-O(1)                              | 86.92(11)  |
| N(4)#2-Cd(1)-O(1)                                                                                                                                 | 146.72(11) | O(4)#1-Cd(1)-O(1)                             | 80.06(14)  | N(2)#3-Cd(1)-O(5)                            | 161.04(14) | N(4)#2-Cd(1)-O(5)                              | 81.50(14)  |
| O(4)#1-Cd(1)-O(5)                                                                                                                                 | 83.25(15)  | O(2)-Cd(1)-N(2)#3                             | 111.12(10) | N(4)#2-Cd(1)-N(2)#3                          | 89.12(9)   | O(4)#1-Cd(1)-N(2)#3                            | 91.39(13)  |
| N(4)#2-Cd(1)-O(2)                                                                                                                                 | 96.90(10)  | O(4)#1-Cd(1)-O(2)                             | 126.08(13) | O(4)#1-Cd(1)-N(4)#2                          | 133.09(13) |                                                |            |
| Symmetry codes: #1 -x+2,-y,-z+1; #2 -x+1,y-1/2,-z+1/2; #3 x,-y+1/2,z+1/2.                                                                         |            |                                               |            |                                              |            |                                                |            |
| CP 2                                                                                                                                              |            |                                               |            |                                              |            |                                                |            |
| Cd(1)-Cl(1)                                                                                                                                       | 2.459(2)   | Cd(1)-O(5)                                    | 2.422(7)   | Cd(1)-O(13)                                  | 2.262(6)   | Cd(1)-O(10) <sup>#4</sup>                      | 2.263(6)   |
| Cd(1)-N(2)                                                                                                                                        | 2.301(6)   | Cd(2)-Cl(2)                                   | 2.513(3)   | Cd(2)-O(6)                                   | 2.170(6)   | Cd(2)-O(9)                                     | 2.265(6)   |
| Cd(2)-O(13)                                                                                                                                       | 2.274(6)   | Cd(2)-N(3) <sup>#5</sup>                      | 2.232(7)   | Cd(3)-O(7)                                   | 2.305(5)   | Cd(3)-O(8)                                     | 2.402(5)   |
| Cd(3)-O(1) <sup>#7</sup>                                                                                                                          | 2.302(7)   | Cd(3)-O(2) <sup>#7</sup>                      | 2.375(5)   | Cd(3)-N(6) <sup>#6</sup>                     | 2.230(6)   | Cd(3)-N(11) <sup>#3</sup>                      | 2.264(6)   |
| Cd(4)-N(10)                                                                                                                                       | 2.282(7)   | Cd(4)-O(3) <sup>#6</sup>                      | 2.392(5)   | Cd(4)-O(4) <sup>#6</sup>                     | 2.354(6)   | Cd(4)-O(11) <sup>#9</sup>                      | 2.283(5)   |
| Cd(4)-O(12) <sup>#9</sup>                                                                                                                         | 2.392(5)   | Cd(4)-N(7) <sup>#8</sup>                      | 2.284(6)   |                                              |            |                                                |            |
| O(10) <sup>#4</sup> -Cd(1)-O(13)                                                                                                                  | 87.4(2)    | O(10) <sup>#4</sup> -Cd(1)-N(2)               | 94.6(2)    | O(13)-Cd(1)-N(2)                             | 176.2(2)   | O(10) <sup>#4</sup> -Cd(1)-O(5)                | 81.9(2)    |
| O(13)-Cd(1)-O(5)                                                                                                                                  | 82.6(2)    | N(2)-Cd(1)-O(5)                               | 94.4(2)    | O(10) <sup>#4</sup> -Cd(1)-Cl(1)             | 160.62(19) | O(13)-Cd(1)-Cl(1)                              | 80.51(15)  |
| N(2)-Cd(1)-Cl(1)                                                                                                                                  | 96.69(17)  | O(5)-Cd(1)-Cl(1)                              | 81.59(15)  | O(6)-Cd(2)-N(3) <sup>#5</sup>                | 104.0(2)   | O(6)-Cd(2)-O(9)                                | 97.1(2)    |
| N(3) <sup>#5</sup> -Cd(2)-O(9)                                                                                                                    | 82.4(2)    | O(6)-Cd(2)-O(13)                              | 111.1(2)   | N(3) <sup>#5</sup> -Cd(2)-O(13)              | 101.9(2)   | O(9)-Cd(2)-O(13)                               | 149.2(2)   |
| O(6)-Cd(2)-Cl(2)                                                                                                                                  | 90.42(17)  | N(3) <sup>#5</sup> -Cd(2)-Cl(2)               | 164.27(17) | O(9)-Cd(2)-Cl(2)                             | 89.68(16)  | O(13)-Cd(2)-Cl(2)                              | 78.24(16)  |
| N(6) <sup>#6</sup> -Cd(3)-N(11) <sup>#3</sup>                                                                                                     | 106.2(3)   | N(6) <sup>#6</sup> -Cd(3)-O(7)                | 102.1(2)   | N(11) <sup>#3</sup> -Cd(3)-O(7)              | 111.2(2)   | N(6) <sup>#6</sup> -Cd(3)-O(1) <sup>#7</sup>   | 104.0(3)   |
| N(11) <sup>#3</sup> -Cd(3)-O(1) <sup>#7</sup>                                                                                                     | 83.7(2)    | O(7)-Cd(3)-O(1) <sup>#7</sup>                 | 144.7(2)   | N(6) <sup>#6</sup> -Cd(3)-O(2) <sup>#7</sup> | 85.2(2)    | N(11) <sup>#3</sup> -Cd(3)-O(2) <sup>#7</sup>  | 137.9(2)   |
| O(7)-Cd(3)-O(2) <sup>#7</sup>                                                                                                                     | 105.39(19) | O(1) <sup>#7</sup> -Cd(3)-O(2) <sup>#7</sup>  | 54.2(2)    | N(6) <sup>#6</sup> -Cd(3)-O(8)               | 158.2(2)   | N(11) <sup>#3</sup> -Cd(3)-O(8)                | 85.9(2)    |
| O(7)-Cd(3)-O(8)                                                                                                                                   | 56.22(16)  | O(1) <sup>#7</sup> -Cd(3)-O(8)                | 95.1(2)    | O(2) <sup>#7</sup> -Cd(3)-O(8)               | 97.95(17)  | N(7) <sup>#8</sup> -Cd(4)-N(10)                | 102.8(2)   |
| N(7) <sup>#8</sup> -Cd(4)-O(11) <sup>#9</sup>                                                                                                     | 108.6(2)   | N(10)-Cd(4)-O(11) <sup>#9</sup>               | 100.8(2)   | N(7) <sup>#8</sup> -Cd(4)-O(4) <sup>#6</sup> | 83.0(2)    | N(10)-Cd(4)-O(4) <sup>#6</sup>                 | 100.5(2)   |
| O(11) <sup>#9</sup> -Cd(4)-O(4) <sup>#6</sup>                                                                                                     | 152.80(18) | N(7) <sup>#8</sup> -Cd(4)-O(12) <sup>#9</sup> | 90.89(19)  | N(10)-Cd(4)-O(12) <sup>#9</sup>              | 155.9(2)   | O(11) <sup>#9</sup> -Cd(4)-O(12) <sup>#9</sup> | 55.64(19)  |
| O(4) <sup>#6</sup> -Cd(4)-O(12) <sup>#9</sup>                                                                                                     | 100.86(18) | N(7) <sup>#8</sup> -Cd(4)-O(3) <sup>#6</sup>  | 138.4(2)   | N(10)-Cd(4)-O(3) <sup>#6</sup>               | 85.7(2)    | O(11) <sup>#9</sup> -Cd(4)-O(3) <sup>#6</sup>  | 109.57(19) |
| O(4) <sup>#6</sup> -Cd(4)-O(3) <sup>#6</sup>                                                                                                      | 55.50(17)  | O(12) <sup>#9</sup> -Cd(4)-O(3) <sup>#6</sup> | 97.15(18)  |                                              |            |                                                |            |
| Symmetry codes: #3 y+1,-x+y+1,z-1/6; #4 y,-x+y,z-1/6; #5 x-y,x,z+1/6; #6 x-y+1,x,z+1/6; #7 -y+1,x-y+1,z+1/3; #8 -y+1,x-y,z+1/3; #9 x-y,x-1,z+1/6. |            |                                               |            |                                              |            |                                                |            |
| CP 3                                                                                                                                              |            |                                               |            |                                              |            |                                                |            |
| O(1)-Zn(1)                                                                                                                                        | 1.9031(15) | N(2)-Zn(1)#1                                  | 2.0291(18) | N(4)-Zn(1)#2                                 | 1.9983(17) | O(3)-Zn(1)#3                                   | 1.8885(16) |
| O(3)#3-Zn(1)-O(1)                                                                                                                                 | 117.82(8)  | O(3)#3-Zn(1)-N(4)#4                           | 106.07(8)  | O(1)-Zn(1)-N(4)#4                            | 117.40(6)  | O(3)#3-Zn(1)-N(2)#5                            | 107.80(7)  |
| O(1)-Zn(1)-N(2)#5                                                                                                                                 | 101.11(7)  | N(4)#4-Zn(1)-N(2)#5                           | 105.50(7)  |                                              |            |                                                |            |
| Symmetry codes: #1 -x+y-1/3,-x+1/3,z+1/3; #2 x-y+2/3,x+1/3,-z+1/3; #3 -x,-y+1,-z+1; #4 y-1/3,-x+y+1/3,-z+1/3; #5 -y+1/3,x-y+2/3,z-1/3.            |            |                                               |            |                                              |            |                                                |            |

**Table S3** Standard deviation and detection limit calculation for Fe<sup>3+</sup>, Cr<sub>2</sub>O<sub>7</sub><sup>2-</sup> and NZF in 1

|                          | Fe <sup>3+</sup>      | Cr <sub>2</sub> O <sub>7</sub> <sup>2-</sup> | NZF                   |
|--------------------------|-----------------------|----------------------------------------------|-----------------------|
| 1                        | 597.223388            | 597.137779                                   | 609.978518            |
| 2                        | 597.525673            | 597.251263                                   | 609.631232            |
| 3                        | 597.021232            | 597.457365                                   | 609.593265            |
| 4                        | 597.441231            | 597.034332                                   | 610.012316            |
| 5                        | 597.282718            | 597.001232                                   | 609.891231            |
| Standard deviation (σ)   | 0.17592               | 0.16547                                      | 0.17563               |
| Ksv                      | 1.41×10 <sup>4</sup>  | 1.58×10 <sup>4</sup>                         | 3.78×10 <sup>4</sup>  |
| Detection limit (3σ/Ksv) | 3.74×10 <sup>-5</sup> | 3.14×10 <sup>-5</sup>                        | 1.39×10 <sup>-5</sup> |

**Table S4** Standard deviation and detection limit calculation for Fe<sup>3+</sup>, Cr<sub>2</sub>O<sub>7</sub><sup>2-</sup> and NZF in 2

|                          | Fe <sup>3+</sup>      | Cr <sub>2</sub> O <sub>7</sub> <sup>2-</sup> | NZF                   |
|--------------------------|-----------------------|----------------------------------------------|-----------------------|
| 1                        | 502.762131            | 520.508999                                   | 521.254927            |
| 2                        | 502.531144            | 520.421232                                   | 521.373216            |
| 3                        | 502.827535            | 520.671313                                   | 521.094313            |
| 4                        | 502.914577            | 520.831752                                   | 521.512132            |
| 5                        | 502.521374            | 520.412266                                   | 521.136545            |
| Standard deviation (σ)   | 0.15871               | 0.16094                                      | 0.15369               |
| Ksv                      | 1.14×10 <sup>4</sup>  | 1.96×10 <sup>4</sup>                         | 2.87×10 <sup>4</sup>  |
| Detection limit (3σ/Ksv) | 4.18×10 <sup>-5</sup> | 2.46×10 <sup>-5</sup>                        | 1.61×10 <sup>-5</sup> |

**Table S5** Standard deviation and detection limit calculation for Fe<sup>3+</sup>, Cr<sub>2</sub>O<sub>7</sub><sup>2-</sup> and NZF in **3**

|                                   | Fe <sup>3+</sup>      | Cr <sub>2</sub> O <sub>7</sub> <sup>2-</sup> | NZF                   |
|-----------------------------------|-----------------------|----------------------------------------------|-----------------------|
| 1                                 | 439.068312            | 450.361476                                   | 449.693751            |
| 2                                 | 439.214273            | 450.413143                                   | 449.603243            |
| 3                                 | 438.912313            | 450.291399                                   | 449.814321            |
| 4                                 | 439.212645            | 450.466366                                   | 449.513354            |
| 5                                 | 439.308066            | 450.781232                                   | 449.923171            |
| Standard deviation ( $\sigma$ )   | 0.13854               | 0.16942                                      | 0.14605               |
| Ksv                               | $1.38 \times 10^4$    | $1.35 \times 10^4$                           | $2.20 \times 10^4$    |
| Detection limit ( $3\sigma/Ksv$ ) | $3.01 \times 10^{-5}$ | $3.76 \times 10^{-5}$                        | $1.99 \times 10^{-5}$ |

**Table S6** Comparison of various CPs sensors for the detection of Fe<sup>3+</sup>, Cr<sub>2</sub>O<sub>7</sub><sup>2-</sup> and NZF.

|   | Analyte                                      | CPs-based fluorescent Materials                                                                                                      | Quenching constant (K <sub>SV</sub> , M <sup>-1</sup> ) | Detection Limits (DL)      | Media                    | Ref   |
|---|----------------------------------------------|--------------------------------------------------------------------------------------------------------------------------------------|---------------------------------------------------------|----------------------------|--------------------------|-------|
| 1 | Fe <sup>3+</sup>                             | [H <sub>2</sub> N(CH <sub>3</sub> ) <sub>2</sub> ] <sub>2</sub> [Zn <sub>2</sub> L(HPO <sub>3</sub> ) <sub>2</sub> ]                 | 3.96 × 10 <sup>5</sup>                                  | 1.16 × 10 <sup>-4</sup> mM | H <sub>2</sub> O         | 21    |
| 2 |                                              | {[Tb(Cmdep)(H <sub>2</sub> O) <sub>3</sub> ] <sub>2</sub> (NO <sub>3</sub> ) <sub>2</sub> ·5H <sub>2</sub> O} <sub>n</sub>           | 5532                                                    | 1.5 mM                     | H <sub>2</sub> O         | 22    |
| 3 |                                              | {[Cu <sup>I</sup> <sub>2</sub> (tpta) <sub>2</sub> ][Cu <sup>II</sup> (bptc)]·3H <sub>2</sub> O·DMF} <sub>n</sub>                    | 3.817 × 10 <sup>3</sup>                                 | 2.59 μM                    | H <sub>2</sub> O         | 23    |
| 4 |                                              | {[Co <sub>4</sub> (timb) <sub>2</sub> (Br-IPA) <sub>4</sub> ]·5H <sub>2</sub> O} <sub>n</sub>                                        | 1.79 × 10 <sup>4</sup>                                  | 3.01 × 10 <sup>-5</sup> M  | H <sub>2</sub> O         | 24    |
| 5 |                                              | [Tb(HMDIA)(H <sub>2</sub> O) <sub>3</sub> ]·H <sub>2</sub> O                                                                         | 1.73 × 10 <sup>4</sup>                                  |                            | H <sub>2</sub> O         | 25(a) |
| 6 |                                              | {[Zn(oba)(L) <sub>0.5</sub> ]-dma} <sub>n</sub>                                                                                      | 9.3 × 10 <sup>3</sup>                                   |                            | DMF/<br>H <sub>2</sub> O | 25(b) |
| 7 |                                              | {[Cd <sub>2</sub> (SA) <sub>2</sub> (L) <sub>2</sub> ]·H <sub>2</sub> O} <sub>n</sub>                                                | 2.1 × 10 <sup>4</sup>                                   | 2.4 × 10 <sup>-6</sup> M   | DMF/<br>H <sub>2</sub> O | 25(c) |
|   | {[Cd(CDC)(L)]} <sub>n</sub>                  | 4.9 × 10 <sup>3</sup>                                                                                                                | 7.4 × 10 <sup>-5</sup> M                                |                            |                          |       |
| 1 | Cr <sub>2</sub> O <sub>7</sub> <sup>2-</sup> | [Cd <sub>2</sub> (L <sub>1</sub> )(1,4-NDC) <sub>2</sub> ] <sub>n</sub>                                                              | 5.86 × 10 <sup>4</sup>                                  | 0.031 ppm                  | H <sub>2</sub> O         | 26    |
| 2 |                                              | [Zr <sub>6</sub> O <sub>4</sub> (OH) <sub>8</sub> (H <sub>2</sub> O) <sub>4</sub> (TCPP) <sub>4</sub> ]<br>□9DMF□3.5H <sub>2</sub> O | 5.91 × 10 <sup>4</sup>                                  |                            | H <sub>2</sub> O         | 27    |
| 3 |                                              | {[Zn(H <sub>2</sub> BCA)(m-bib)]·H <sub>2</sub> O} <sub>n</sub>                                                                      | 5.3 × 10 <sup>4</sup>                                   | 0.07 μM                    | H <sub>2</sub> O         | 28    |
| 4 |                                              | [Zn <sub>5</sub> (TDA) <sub>4</sub> (TZ) <sub>4</sub> ]·4DMF] <sub>n</sub>                                                           | 6.77 × 10 <sup>3</sup>                                  |                            | H <sub>2</sub> O         | 29    |
| 5 |                                              | [Zn(NH <sub>2</sub> -bdc)(4,4'-bpy)]                                                                                                 | 7.62 × 10 <sup>3</sup>                                  | 1.30 μM                    | H <sub>2</sub> O         | 30    |
| 6 |                                              | [Cd <sub>1.5</sub> (L) <sub>2</sub> (bpy)(NO <sub>3</sub> ) <sub>2</sub> ]·2DMF·2H <sub>2</sub> O                                    | 5.42 × 10 <sup>4</sup>                                  | 320 ppb                    | H <sub>2</sub> O         | 31    |
| 1 |                                              | {[Cd <sub>3</sub> (TDCPB)·2DMAc]·DMAc·4H <sub>2</sub> O} <sub>n</sub>                                                                | 7.46 × 10 <sup>4</sup>                                  |                            | DMAc                     | 32    |
| 2 |                                              | {[Tb(TATMA)(H <sub>2</sub> O)·2H <sub>2</sub> O] <sub>n</sub>                                                                        | 3.00 × 10 <sup>4</sup>                                  |                            | H <sub>2</sub> O         | 33    |
| 3 |                                              | [Zn(L) <sub>2</sub> ]·CH <sub>2</sub> Cl <sub>2</sub> ·CH <sub>3</sub> OH                                                            | 1.62 × 10 <sup>4</sup>                                  |                            | CH <sub>3</sub> OH       | 34    |
| 4 |                                              | [Cd(tptc) <sub>0.5</sub> (o-bimb)] <sub>n</sub>                                                                                      | 4.4 × 10 <sup>4</sup>                                   |                            | DMF                      | 35    |
| 5 |                                              | [Cd(H <sub>2</sub> tptc) <sub>0.5</sub> (mbimb)(Cl)] <sub>n</sub>                                                                    | 2.1 × 10 <sup>5</sup>                                   |                            |                          |       |
| 6 |                                              | [Zn <sub>2</sub> (azdc) <sub>2</sub> (dpta)]·(DMF) <sub>4</sub>                                                                      | 1.30 × 10 <sup>5</sup>                                  | 0.63 ppm                   | DMF                      | 36    |

H<sub>3</sub>CmdepBr = N-carboxymethyl-(3,5-dicarboxyl)pyridinium bromide;

tpta = tris(4-(1,2,4-triazol-1-yl)phenyl)amine, H<sub>4</sub>bptc = 3,3',4,4'-biphenyltetracarboxylic acid;

timb=1,3,5-tris(2-methylimidazol-1-yl)benzene;

H<sub>4</sub>MDIA= 5,5'-methylenediisophthalic acid;

L = 3,3'-azodipyridine, H<sub>2</sub>oba = 4,4'-oxydibenzoic acid;

H<sub>2</sub>SA = succinic acid, H<sub>2</sub>CDC = 1,4-Cyclohexanedicarboxylic acid, L = [3,3'-azobis(pyridine)];

L1 = 1,4-bis(benzimidazol-1-yl)-2-butylene, 1,4-H<sub>2</sub>NDC = 1,4-naphthalenedicarboxylic acid;

H<sub>4</sub>TCPP=2,3,5,6-tetrakis(4-carboxyphenyl)pyrazine;

H<sub>2</sub>BCA= bis(4-carboxybenzyl)amine, m-bib = 1,3-bis(1-imidazolyl)benzene;

H<sub>2</sub>TDA = thiophene-2,5-dicarboxylic acid, HTZ = 1H-1,2,4-Triazole;

NH<sub>2</sub>-H<sub>2</sub>bdc = 2-amino-1,4-benzenedicarboxylic acid, 4,4'-bpy = 4,4'-bipyridine;

HL = 4-(4-carboxyphenyl)-1,2,4-triazole, bpy = 4,4'-bipyridine;

H<sub>6</sub>TDCPB = 1,3,5-tris[3,5-bis(3-carboxylphenyl-1-yl)phenyl-1-yl]benzene;

H<sub>3</sub>TATMA = 4, 4',4''-s-triazine-1,3,5-triyltri-m-aminobenzoate

HL = 2-hydroxy-4-(pyridin-4-yl)benzaldehyde

H<sub>4</sub>tptc = p-terphenyl-2,2'',5'',5'''-tetracarboxylate acid

bimb = ortho/meta-bis(imidazol-1-ylmethyl)benzene

H<sub>2</sub>azdc = Azobenzene-4,4'-dicarboxylic Acid

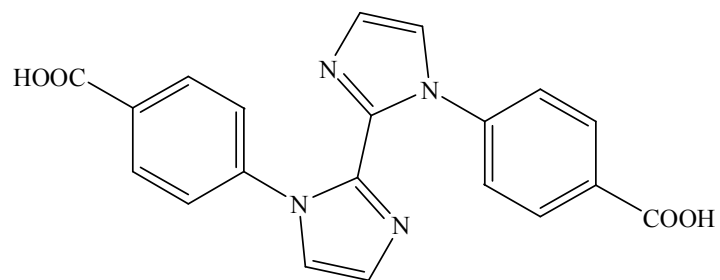

**Scheme S1.** The structure of 1,1'-di(4-carboxyphenyl)-2,2'-biimidazole ( $H_2L$ )

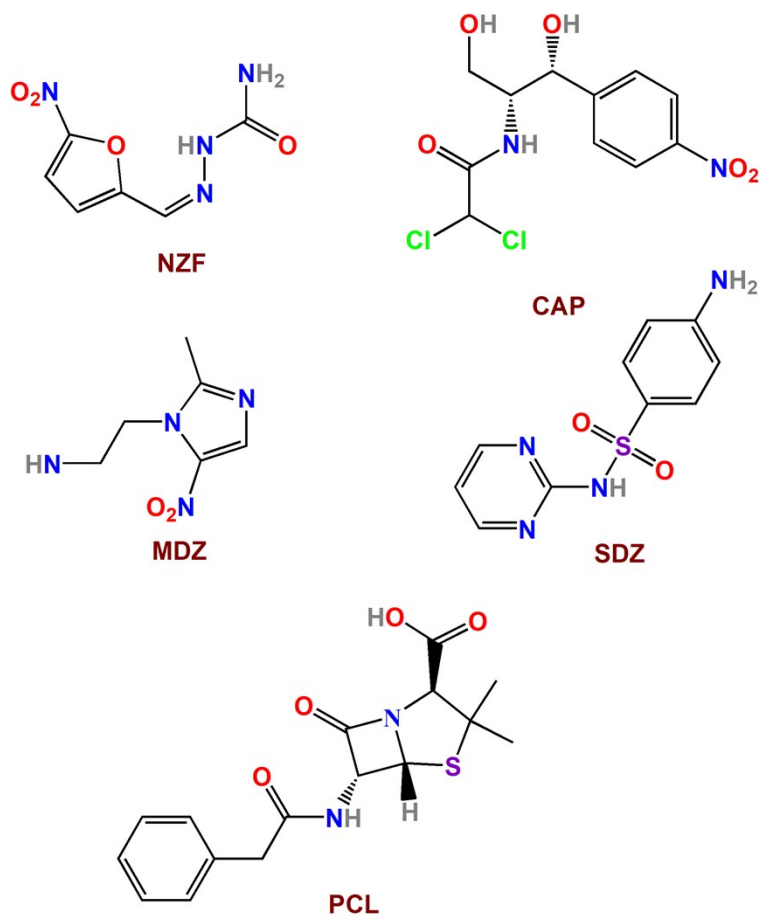

**Scheme S2.** The structures of selected antibiotics



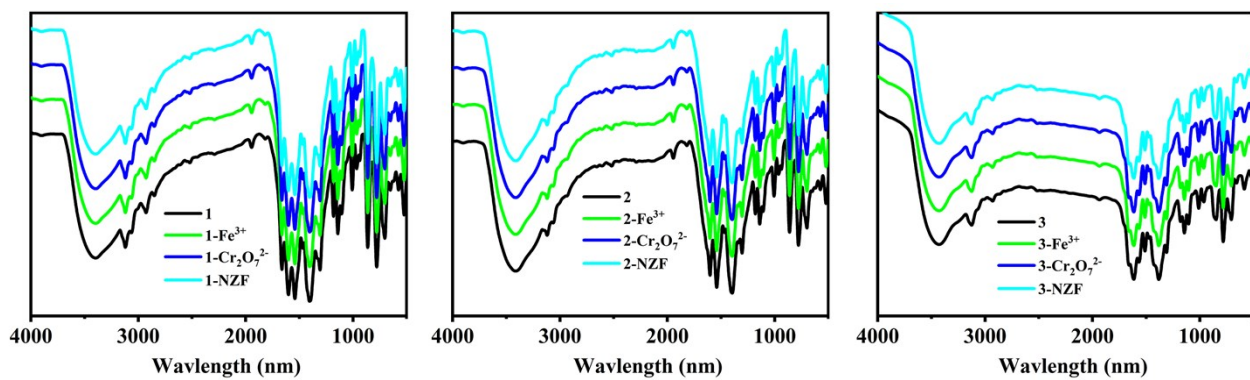

Fig. S1 FT-IR spectra of 1-3 and 1-3 recovered from  $\text{Fe}^{3+}$ ,  $\text{Cr}_2\text{O}_7^{2-}$  and NZF

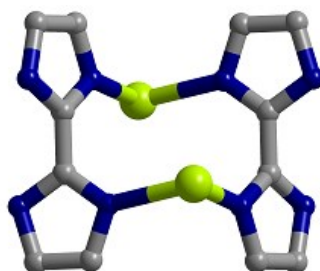

Fig. S2 The binuclear  $[\text{Cd}_2(\text{BIM})_2]$  SBU in **1**

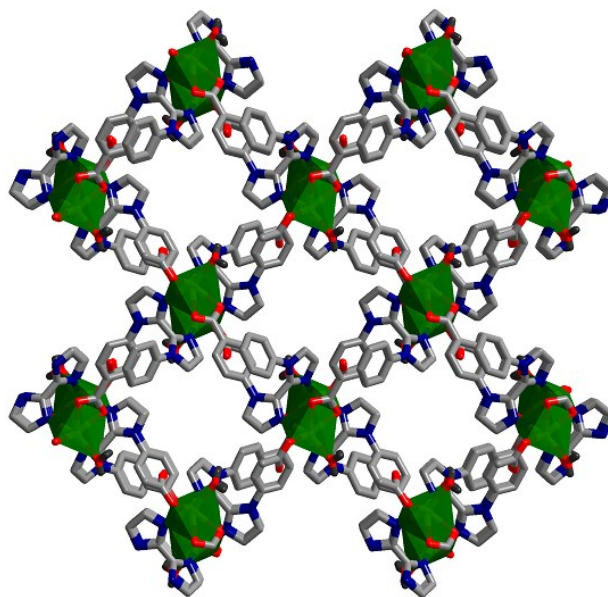

Fig. S3 The 3D porous network with the 1D circular channels of **1**

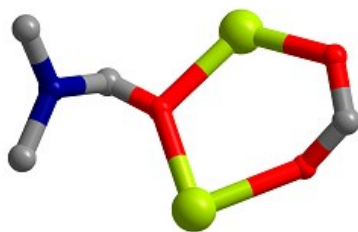

**Fig. S4** The binuclear  $[\text{Cd}_2(\text{COO})_2(\text{DMF})]$  cluster in **2**

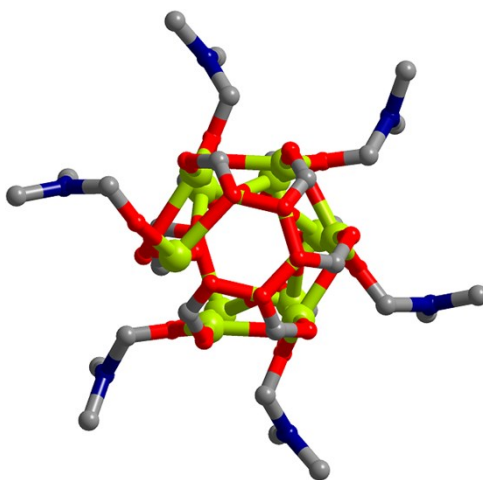

**Fig. S5** The 1D  $[\text{Cd}_2(\text{COO})_2(\text{DMF})]_n$  chain with 6-fold helix in **2**

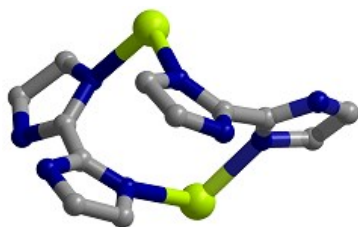

**Fig. S6** The binuclear  $[\text{Cd}_2(\text{BIM})_2]$  SBU in **2**

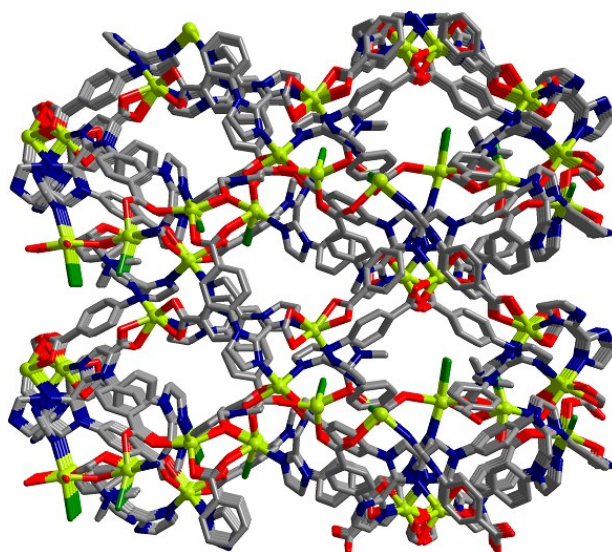

**Fig. S7** The 3D porous network of **2**

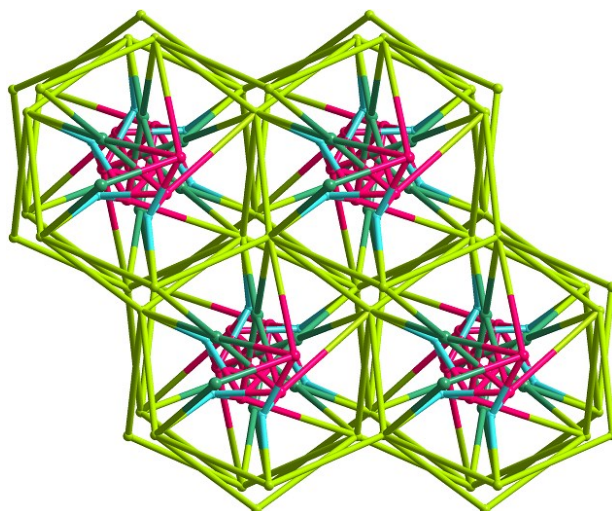

**Fig. S8** The 3D 4-nodal (3,4,5,8)-c  $\{4.5^2\} \{4^3.5^3\} \{4^3.5^7\} \{4^5.5^{11}.6^7.7^4.8\}$  net of **2**

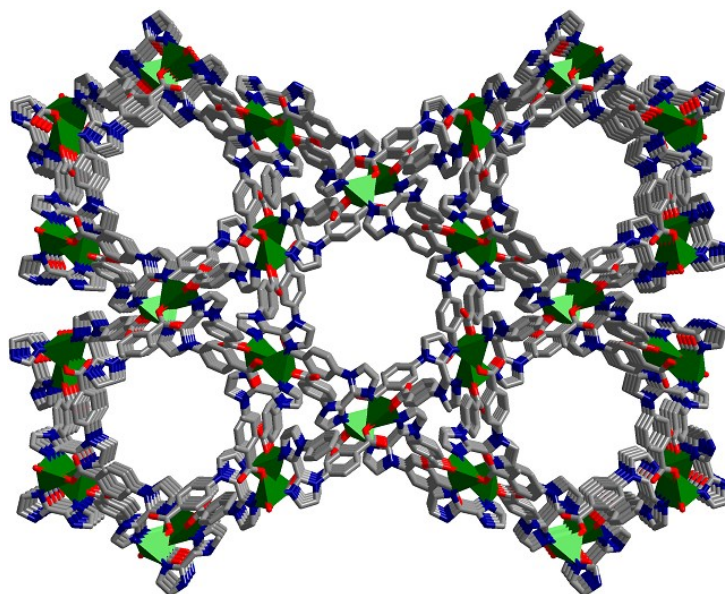

Fig. S9 The 3D porous framework containing the 1D circle channels of 3

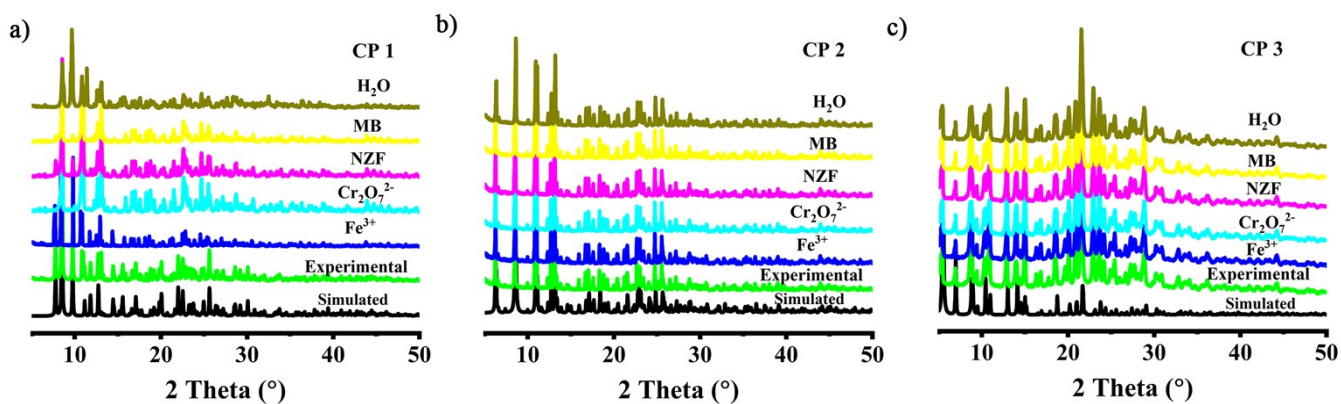

Fig. S10 PXR D patterns of 1-3

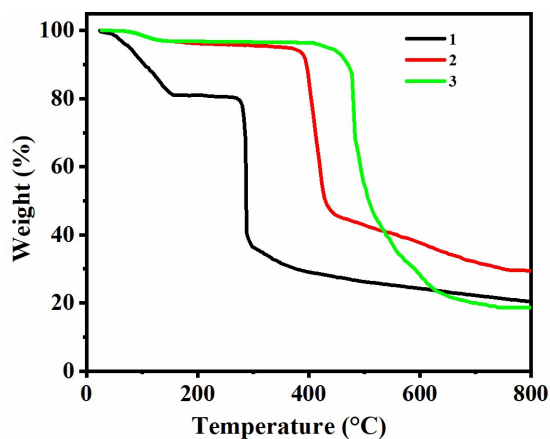

Fig. S11 TGA curves for 1-3

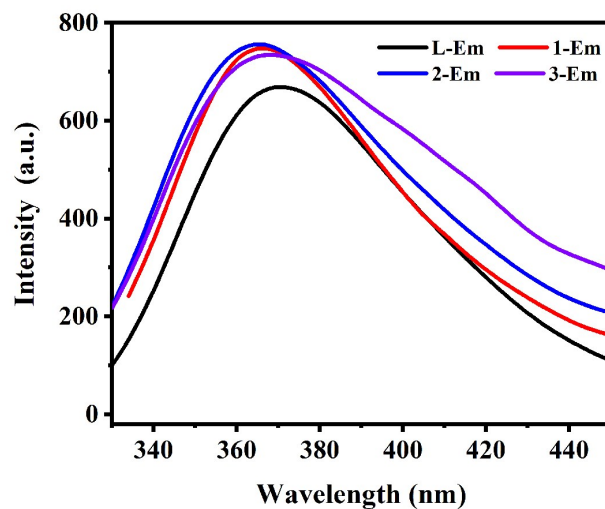

Fig. S12 The solid state diffuse-reflectance spectra for 1, 2, 3 and H<sub>2</sub>L ligand

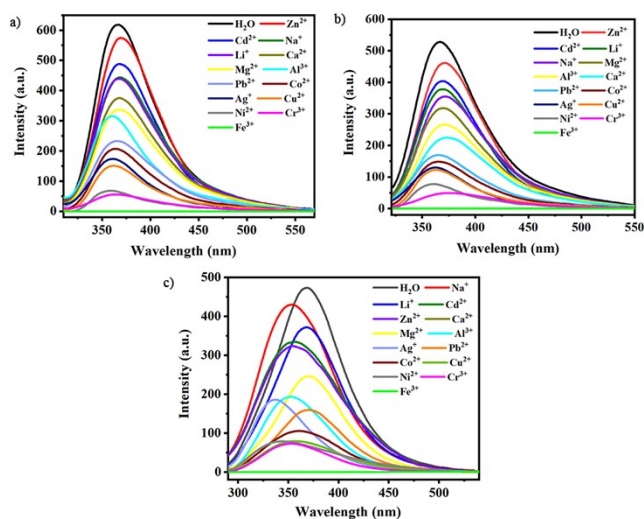

Fig. S13 Fluorescence response of 1(a), 2(b) and 3(c) toward different metal cations in H<sub>2</sub>O solution

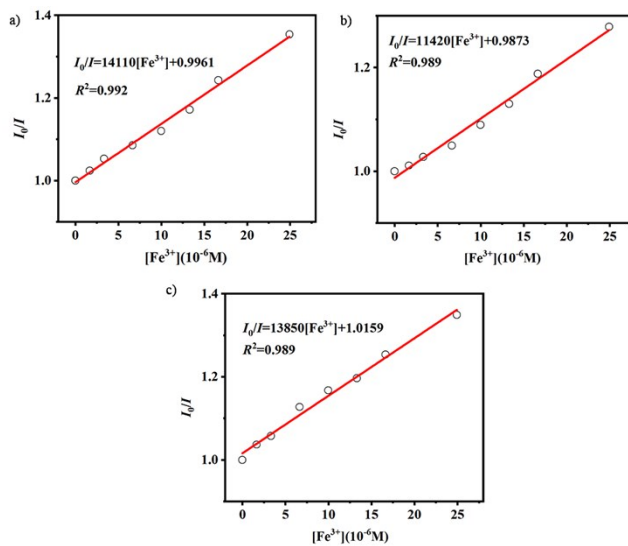

Fig. S14 The stern–Volmer plots of Fe<sup>3+</sup> in 1(a), 2(b) and 3(c).

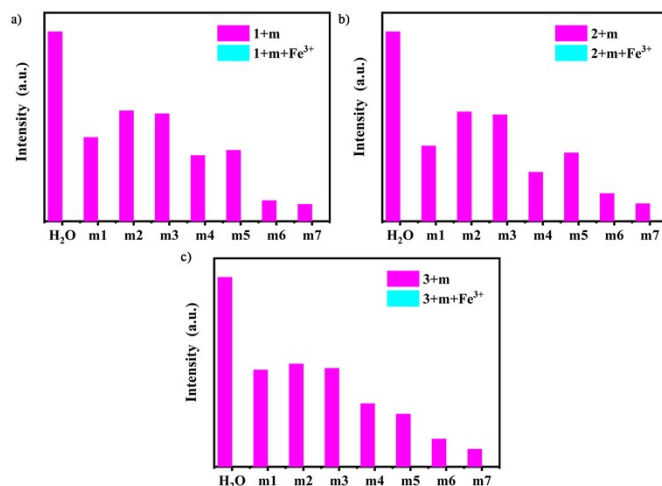

**Fig. S15** Luminescence intensity of **1(a)**, **2(b)** and **3(c)** with different cations solution added Fe<sup>3+</sup> ions (10<sup>-2</sup> M) (m1: Ag<sup>+</sup>/Na<sup>+</sup>/Co<sup>2+</sup>; m2: Li<sup>+</sup>/Ni<sup>2+</sup>/Zn<sup>2+</sup>; m3: Mg<sup>2+</sup>/Pb<sup>2+</sup>/Cd<sup>2+</sup>; m4: Cr<sup>3+</sup>/Ca<sup>2+</sup>; m5: Al<sup>3+</sup>/Cu<sup>2+</sup>; m6: Ni<sup>2+</sup>; m7: Cr<sup>3+</sup>).

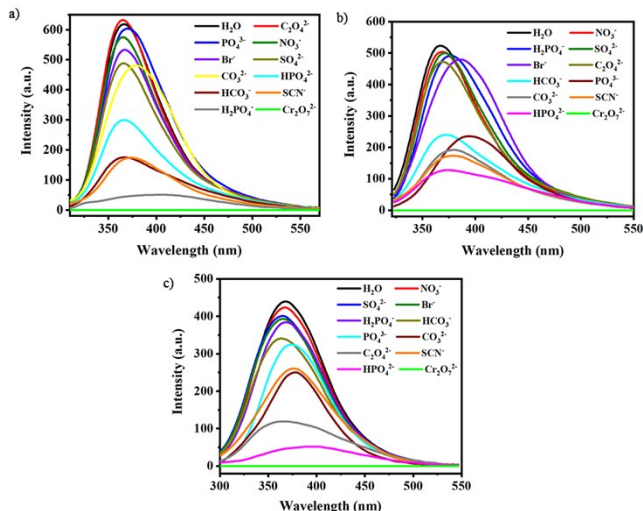

**Fig. S16** Fluorescence response of **1(a)**, **2(b)** and **3(c)** toward different anions in H<sub>2</sub>O solution.

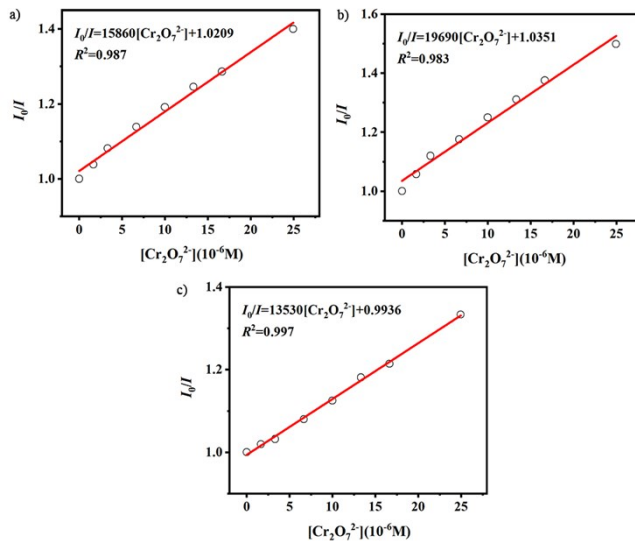

**Fig. S17** The stern–Volmer plots of Cr<sub>2</sub>O<sub>7</sub><sup>2-</sup> in **1(a)**, **2(b)** and **3(c)**.

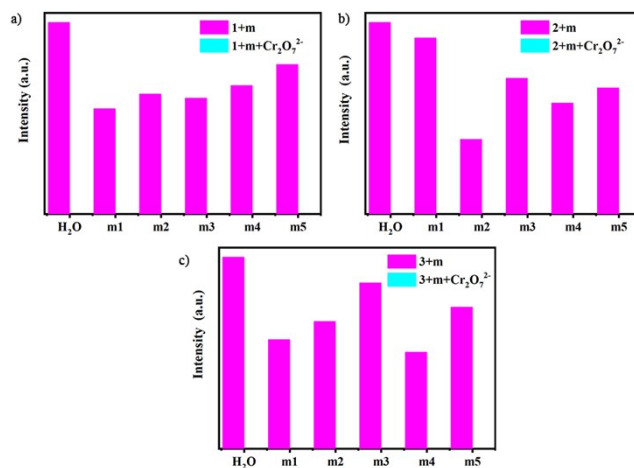

**Fig. S18** Luminescence intensity of **1**(a), **2**(b) and **3**(c) with different mixed cations solution added  $\text{Cr}_2\text{O}_7^{2-}$  ions ( $10^{-2}$  M) (m1:  $\text{C}_2\text{O}_4^{2-}/\text{H}_2\text{PO}_4^-$ ; m2:  $\text{PO}_4^{3-}/\text{SCN}^-$ ; m3:  $\text{NO}_3^-/\text{HCO}_3^-$ ; m4:  $\text{Br}^-/\text{HPO}_4^{2-}$ ; m5:  $\text{SO}_4^{2-}/\text{CO}_3^{2-}$ ).

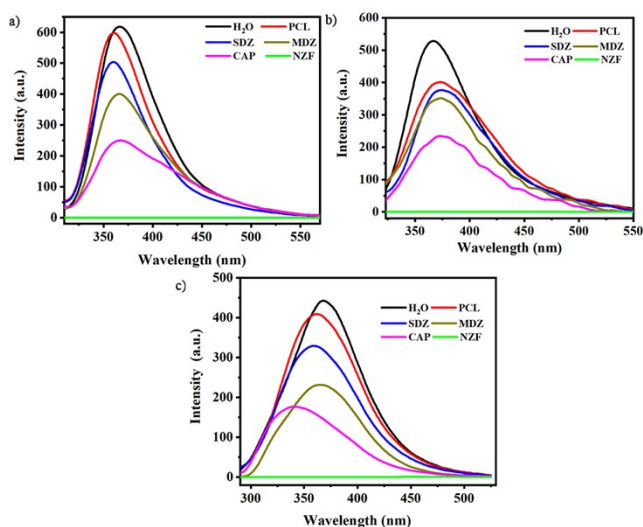

**Fig. S19** Fluorescence response of **1**(a), **2**(b) and **3**(c) toward different antibiotics in H<sub>2</sub>O solution.

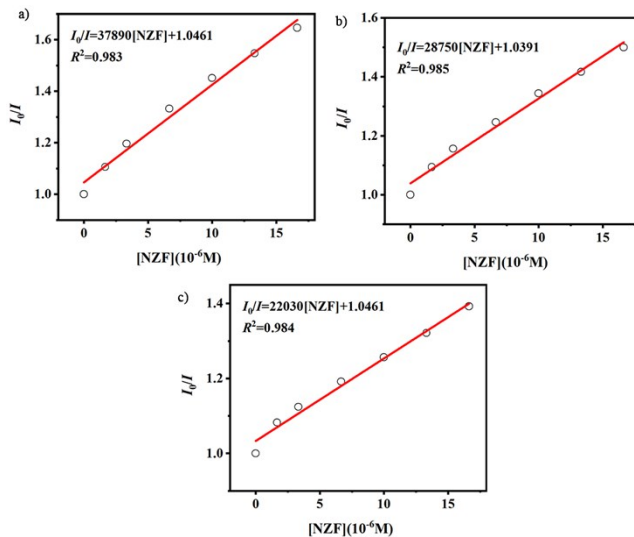

**Fig. S20** The stern-Volmer plots of NZF in **1**(a), **2**(b) and **3**(c).

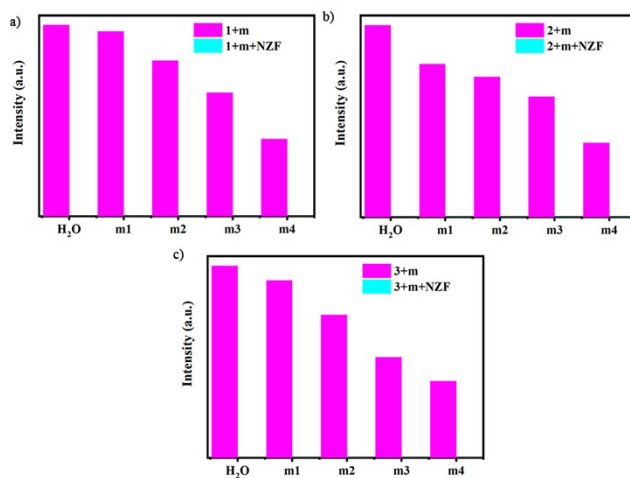

**Fig. S21** Luminescence intensity of **1**(a), **2**(b) and **3**(c) with different mixed cations solution added NZF (10<sup>-2</sup> M) (m1: PCL; m2: SDZ; m3: MDZ; m4: CAP).

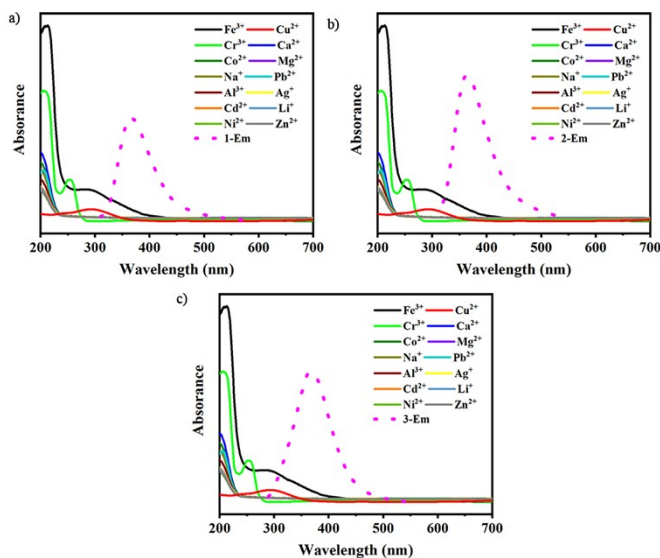

**Fig. S22** UV-vis spectra of different cations in H<sub>2</sub>O solutions, and the emission spectra of **1**(a), **2**(b) and **3**(c).

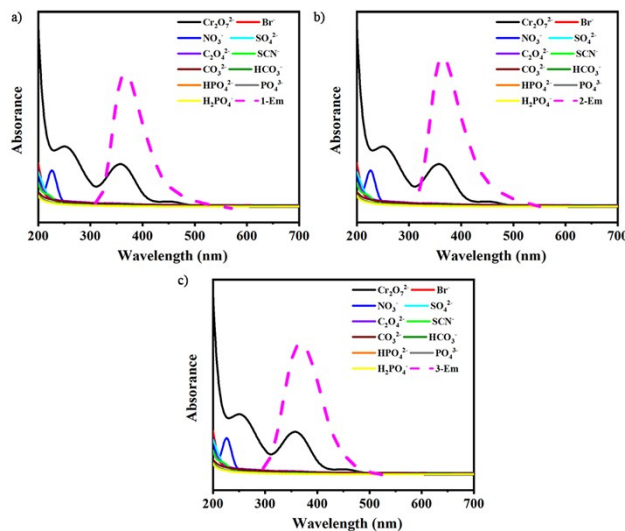

**Fig. S23** UV-vis spectra of different anions in H<sub>2</sub>O solutions, and the emission spectra of **1**(a), **2**(b) and **3**(c).



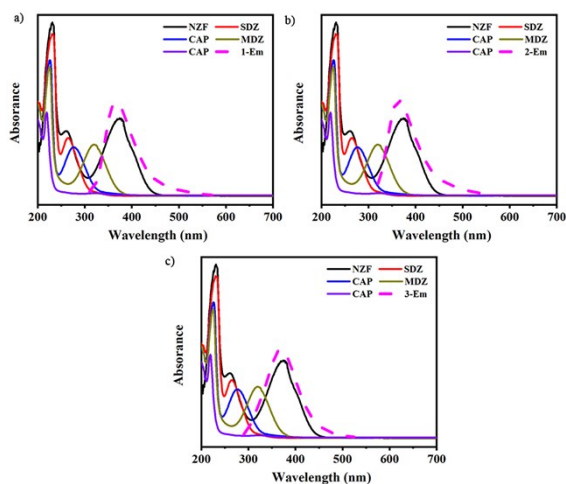

**Fig. S24** UV-vis spectra of different antibiotics in H<sub>2</sub>O solutions, and the emission spectra of **1(a)**, **2(b)** and **3(c)**.

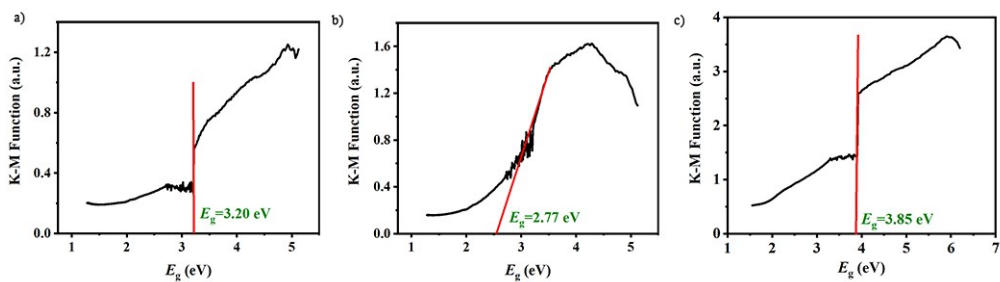

**Fig. S25** Kubelka–Munk-transformed diffuse reflectance spectra of **1(a)**, **2(b)** and **3(c)**.
